# Supplementary material for: Fucoidan-mediated green synthesis of palladium nanoparticles as a recyclable catalyst for Heck coupling and alkyne reduction in pheromone synthesis
Source: Royal Society of Chemistry journal article supplement (doi:10.1039/d5ra08010j), 2025-01-01
Supplement: d5ra08010j1.pdf [file d5ra08010j1.pdf]

## **Fucoidan-mediated green synthesis of palladium nanoparticles as a recyclable catalyst for Heck coupling and alkyne reduction in pheromone synthesis**

†Van-Dung Le<sup>a,b</sup>, †Minh-Vuong Phan<sup>a,b</sup>, Nhat-Minh Phan<sup>a,b</sup>, Nguyen-Khanh-Vu Ngo<sup>a</sup>, Thi-Yen-Nghi Le<sup>a</sup>, Truc-Vy Mai<sup>a</sup>, Duc-Huy Pham<sup>a</sup>, Minh-Trong Tran<sup>a</sup>, Minh-Ty Nguyen<sup>a</sup>, Thi-Cam-Thu Nguyen<sup>a</sup>, Thanh-Danh Nguyen<sup>a,b</sup>, Dinh-Tri Mai<sup>a,b</sup>, Thi-Ngoc-Mai Tran<sup>c</sup>, Thi-Thanh-Tu Nguyen<sup>d</sup>, Hoang-Nhu-Khanh Huynh<sup>e</sup>, Chi-Hien Dang<sup>a,b\*</sup>

<sup>a</sup>Institute of Advanced Technology, Vietnam Academy of Science and Technology,

1B TL29 Street, An Phu Dong Ward, Ho Chi Minh City, Vietnam.

<sup>b</sup>Graduate University of Science and Technology, Vietnam Academy of Science and Technology, 18 Hoang Quoc Viet, Nghia Do Ward, Hanoi, Vietnam.

<sup>c</sup>Institute of Applied Sciences, HUTECH University, Ho Chi Minh city, Vietnam 475A Dien Bien Phu Street, Thanh My Tay Ward, Ho Chi Minh City, Vietnam.

<sup>d</sup>Faculty of Applied Technology, Van Lang School of Technology, Van Lang University, Ho Chi Minh City, Vietnam.

<sup>e</sup>Institute of Oceanography, Vietnam Academy of Science and Technology, 01 Cau Da, Nha Trang, Khanh Hoa, Vietnam.

†*These authors contributed equally to this work*

**\*Corresponding author:** Chi-Hien Dang-Email: [dangchihien@gmail.com](mailto:dangchihien@gmail.com)

| List of Contents                                                                                                                                                      | Pages   |
|-----------------------------------------------------------------------------------------------------------------------------------------------------------------------|---------|
| 1. Experimental procedures and characterization data (GC–MS and NMR spectra) for the Heck coupling reaction, alkyne reduction, and the synthesis of insect pheromone. | S3-S5   |
| 2. GC–MS spectra of the Heck coupling reaction products ( <b>1a–1g</b> )                                                                                              | S8-S11  |
| 3. GC–MS, <sup>1</sup> H NMR, and <sup>13</sup> C NMR spectra of the reduced alkyne products ( <b>2a–2e</b> ).                                                        | S12-S15 |
| 4. GC–MS, <sup>1</sup> H NMR, and <sup>13</sup> C NMR spectra of the synthesized insect pheromone compounds ( <b>4–6</b> ).                                           | S16-S18 |

## 1. Experimental procedures and characterization data (GC–MS and NMR spectra) for the Heck coupling reaction, alkyne reduction, and the synthesis of insect pheromone.

The Heck coupling and Alkyne reduction reactions were carried out under nitrogen (N<sub>2</sub>) atmosphere to ensure reduction and stabilization of the Pd<sup>0</sup> catalyst.

### 1.1. Catalytic activity for Heck reaction

The mixture of aryl halides (**1**) (1 mmol), olefines (**2**) (1.1 mmol), K<sub>2</sub>CO<sub>3</sub> (2.6 mmol), and PdNPs@Fu catalyst (2.0 mg), anhydrous DMF (2.0 mL) was placed in a 25 mL ground-neck flask. Nitrogen gas was bubbled through the mixture for approximately 20 min to remove oxygen. The reaction mixture was stirred with a magnetic stirrer at a temperature of 100 °C for 6 hours in oil bath. Upon completion of the reaction, the conversion was monitored by thin layer chromatography (TLC) using *n*-hexane and ethyl acetate as the solvent system. Subsequently, the mixture was extracted with *n*-hexane, and the organic layer was washed successively with distilled water and saturated brine, dried over anhydrous Na<sub>2</sub>SO<sub>4</sub>, filtered and concentrated under reduced pressure to afford the crude product. The resulting product was isolated through silica gel column chromatography with an *n*-hexane/ethyl acetate mixture as the eluting solvent, and its purity was verified by GCMS analysis. (**Table 2**). The catalyst recycling procedure was carried out as follows: after the completion of the reaction, *n*-hexane was added to the reaction medium to extract the organic components (with a volume ratio of *n*-hexane:DMF = 2:1). The mixture was centrifuged at 4 °C and 10,000 rpm for 5 min, and the hexane layer was carefully separated. The DMF phase was subsequently extracted twice with *n*-hexane. The remaining DMF layer containing the catalyst was reused by adding a fresh mixture of iodobenzene and styrene, followed by continuous stirring for 6 hours to perform the next catalytic run.

**(E)-stiben (1a):** H = 94%. Mp = 122-114 °C. R<sub>f</sub> = . GC-MS (*m/z*): 27, 39, 51, 63, 75, 76, 89, 102, 115, 126, 139, 152, 165, 166, 180 (100).

**(E)-1-methoxy-4-(4-methylstyryl)benzene (1b):** H = 95%. Mp = 167-168. R<sub>f</sub> = 0.85. GC-MS (*m/z*): 15, 28, 42, 51, 63, 76, 89, 104, 127, 139, 152, 164, 181, 193, 209, 224 (100), 226.

**(E)-4-(4-methoxystyryl)benzonitrile (1c):** H = 96%. Mp = 135-137. R<sub>f</sub> = 0.52. GC-MS (*m/z*): 15, 39, 51, 63, 75, 88, 102, 114, 126, 140, 152, 165, 177, 190, 204, 219, 235 (100).

**(E)-1-fluoro-4-(4-methylstyryl)benzene (1d):** H = 80%. Mp = 159-161.  $R_f$  = 0.92. GC-MS ( $m/z$ ): 63, 79, 92, 105, 115, 126, 137, 152, 165, 178, 197, 208, 212 (100).

**(E)-4-(4-fluorostyryl)benzonitrile (1e):** H = 83%. Mp = 135-137.  $R_f$  = 0.63. GC-MS ( $m/z$ ): 27, 39, 51, 63, 75, 85, 98, 111, 120, 131, 145, 157, 169, 183, 196, 208, 223 (100).

**(E)-1-chloro-4-(4-methylstyryl)benzene (1f):** H = 76%. Mp = 200-202.  $R_f$  = 0.85. GC-MS ( $m/z$ ): 27, 36, 51, 63, 76, 89, 99, 115, 128, 139, 152, 163, 178, 193 (100), 228.

**(E)-4-(4-chlorostyryl)benzonitrile (1g):** H = 85. Mp = 173-175.  $R_f$  = 0.73. GC-MS ( $m/z$ ): 39, 51, 63, 75, 88, 99, 113, 126, 151, 164, 176, 204 (100), 224, 239.

## 1.2. Catalytic activity for reduction of alkynes

Alkynes (1 mmol) were reacted with KOH (1.1 mmol) along with PdNPs@Fu (2.0 mg) catalyst in 6 mL of DMF. The mixture was placed in a 25 mL ground-neck flask. Nitrogen gas was bubbled through the mixture for approximately 20 min to remove oxygen. The reaction mixture was stirred with a magnetic stirrer at 110 °C for 6 hours in an oil bath. The completion of the reaction was confirmed by TLC, employing *n*-hexane and ethyl acetate as the mobile phase. After completion of the reaction, the mixture was extracted with ethyl acetate, and the organic layer was successively washed with distilled water and saturated brine, then dried over anhydrous Na<sub>2</sub>SO<sub>4</sub>. The solvent was evaporated under reduced pressure to afford the crude product. The pure compound was subsequently isolated by silica gel column chromatography using an *n*-hexane/ethyl acetate mixture as the eluent, and its purity was verified by GC-MS and <sup>1</sup>H NMR analyses (Table 3). For the catalyst recycling procedure, after the reaction had been completed, ethyl acetate was added to the reaction medium to extract the organic components (volume ratio of ethyl acetate to DMF = 2:1). The resulting mixture was centrifuged at 4 °C and 10,000 rpm for 5 min, and the ethyl acetate layer was carefully removed. The DMF phase was then extracted twice more with ethyl acetate. The residual DMF layer containing the catalyst was reused by adding a fresh portion of 2-(but-2-yn-1-yloxy)tetrahydro-2H-pyran, followed by continuous stirring for 6 h to perform the next catalytic cycle.

**Styrene (2a):** H = 95%. GC-MS ( $m/z$ ): 27, 38, 51, 54, 63, 73, 78, 79, 87, 98, 103, 104 (100).

**4-chlorostyrene (2b):** H = 94%. GC-MS (*m/z*): 27, 37, 51, 52, 63, 77, 85, 98, 103 (100), 112, 123, 138.

**Cis-stilbene (2c):** H = 94%. GC-MS (*m/z*): 15, 27, 39, 51, 63, 76, 89, 98, 115, 126, 139, 152, 154, 165, 180 (100), 181.

**(Z)-1-methoxy-3-styrylbenzene (2d):** H = 93%. <sup>1</sup>H NMR (600 MHz, CDCl<sub>3</sub>): δ 7.54 – 7.52 (*m*, 1H), 7.34 (*d*, *J* = 7.8 Hz, 1H), 7.35 – 7.32 (*m*, 1H), 7.26 – 7.24 (*m*, 2H), 7.23 – 7.17 (*m*, 2H), 7.13 (*t*, *J* = 8.4 Hz, 7.8 Hz 1H), 6.83 (*d*, *J* = 7.2 Hz, 1H), 6.74 (*dd*, *J* = 2.4 Hz, 8.4 Hz, 1H), 6.62 – 6.56 (*m*, 1H), 3.64 (*s*, 3H). <sup>13</sup>C NMR (150 MHz, CDCl<sub>3</sub>): δ 159.4; 138.6; 131.7; 130.5; 130.2; 128.9; 128.4; 128.2; 127.1; 116.4; 113.8; 55.0. GC-MS: 51.0, 63.0, 76.0, 89.0, 105.0, 115.0, 139.0, 152.0, 155.0, 165.0, 179.0, 194.0, 210.0.

**(Z)-2-(but-2-en-1-yloxy)tetrahydro-2H-pyran (2e):** H = 94%. <sup>1</sup>H NMR (600 MHz, CDCl<sub>3</sub>): δ 5.69 – 5.64 (*m*, 1H), 5.61 – 5.56 (*m*, 1H), 4.65 – 4.63 (*m*, 1H), 4.29 – 4.25 (*m*, 1H), 3.97 – 3.82 (*m*, 1H), 3.54 – 3.50 (*m*, 2H), 1.87 – 1.64 (*m*, 9H). <sup>13</sup>C NMR (150 MHz, CDCl<sub>3</sub>): δ 127.9; 126.7; 98.0; 62.3; 62.0; 54.7; 30.3; 22.7; 19.6.

### 1.3. Synthesis of insect pheromone

**Synthesis of 2-(dodec-3-yn-1-yloxy)tetrahydro-2H-pyran (3):** 1-decyne (**1**, 1.38 g, 10.0 mmol) was dissolved in THF (5 mL) and transferred to a three-neck round-bottom flask (50 mL). The reaction mixture was stirred with a magnetic stirrer at -78 °C under N<sub>2</sub> atmosphere. Then, 4 mL *n*-BuLi 2.5 M in cyclohexane was added dropwise, followed by a solution of KI (127 mg, 0.77 mmol) was added. After stirring for 1 hour at -78 °C, 2-(2-bromoethoxy)tetrahydro-2H-pyran (**2**, 1.68 mg, 8 mmol) was introduced. After 30 minutes at -78 °C, the reaction was progressively heated to 0 °C and agitated for two hours at room temperature. The mixture was then refluxed for 16 h, and the reaction progress was monitored by thin-layer chromatography (TLC). To obtain the crude product, upon completion, the reaction was quenched, washed with saturated NaHCO<sub>3</sub> solution, extracted with *n*-Hexane, saturated NaCl, and dried over anhydrous MgSO<sub>4</sub>. The crude product (**3**) was used in the subsequent reaction without further purification.

**Synthesis of (Z)-2-(dodec-3-en-1-yloxy)tetrahydro-2H-pyran (4):** A mixture of 2-(dodec-3-yn-1-yloxy)tetrahydro-2H-pyran (**2**, 2 g), KOH (0.5 g), NPsPd@Fu catalyst (2.0 mg), and solvent DMF (6 mL) was placed in a thick-walled Pyrex seal tube. The reaction was carried out at 145 °C for 6 hours under a nitrogen atmosphere to maintain inert conditions. Upon completion, the

reaction mixture was monitored by thin-layer chromatography (TLC) and extracted with *n*-hexane (2 × 30 mL). The organic layer was washed several times with distilled water and dried over anhydrous MgSO<sub>4</sub>. The crude product was then purified by column chromatography (EtOAc: *n*-Hexane) to afford the pure compound (**4**). H = 92%. <sup>1</sup>H NMR (600 MHz, CDCl<sub>3</sub>): δ 5.45–5.44 (*m*, 1H), 5.41–5.36 (*m*, 1H), 4.61 – 5.59 (*m*, 1H), 3.90–3.86 (*m*, 1H), 3.75–3.71 (*m*, 1H), 3.52–3.48 (*m*, 1H), 3.43–3.39 (*m*, 1H), 2.37–2.33 (*m*, 1H), 2.06–2.03 (*m*, 1H), 1.86–1.81 (*m*, 1H), 1.73–1.69 (*m*, 1H), 1.60–1.58 (*m*, 1H), 1.55–1.50 (*m*, 1H), 1.36–1.32 (*m*, 2H), 1.31–1.26 (*m*, 14H), 0.88 (*t*, *J* = 7.2, 13.8 Hz, 3H). <sup>13</sup>C NMR (150 MHz, CDCl<sub>3</sub>): δ 132.1; 125.5; 98.8; 67.1; 62.3; 31.9; 30.7; 29.7; 29.5; 29.3; 29.3; 28.0; 27.4; 25.5; 22.7; 19.6; 14.1.

**Synthesis of (Z)-dodec-3-en-1-ol (5):** Dissolve (Z)-2-(dec-3-en-1-yloxy)tetrahydro-2*H*-pyran (0.4 g) and *p*-toluenesulfonic acid monohydrate (0.03 g) in CH<sub>3</sub>OH (4 mL), and add to 50 mL two-neck round-bottom flask. The reaction mixture was sonicated at room temperature for 2 hours. Monitor the reaction by TLC. After completion, the mixture was washed with saturated NaHCO<sub>3</sub> (30 mL), extracted with diethyl ether, washed with brine, and dried over anhydrous MgSO<sub>4</sub>. Concentrate under reduced pressure and purify the crude product by column chromatography (EtOAc: *n*-Hexane) to afford the pure compound. Finally, the yield was calculated, and the product was labeled accordingly. H = 91%. <sup>1</sup>H NMR (600 MHz, CDCl<sub>3</sub>): δ 5.58 – 5.57 (*m*, 1H), 5.38 – 5.35 (*m*, 1H), 3.64 (*t*, *J* = 6.0, 6.6, 2H), 2.35 – 2.31 (*m*, 2H), 2.08 – 2.03 (*m*, 2H), 1.40 (*s*, 1H), 1.36 – 1.34 (*m*, 2H), 1.33 – 1.24 (*m*, 10H), 0.88 (*t*, *J* = 6.6, 7.2, 3H). GC-MS: 15.0, 27.0, 41.0, 54.0, 57.0, 67.0, 81.0, 82.0, 95.0, 108.0, 109.0, 123.0, 138.0, 151.0, 166.0, 184.0). <sup>13</sup>C NMR (150 MHz, CDCl<sub>3</sub>): δ 133.6; 124.9; 62.4; 31.9; 30.8; 29.7; 29.5; 29.3; 29.3; 27.4; 22.7; 14.0.

**Synthesis of (Z)-dodec-3-en-1-yl (E)-but-2-enoate (6):** Add crotonyl chloride (1.3 g) after dissolving (Z)-dec-3-en-1-ol (1.56 g) in pyridine at 0 °C. After that, the mixture was agitated for two hours at room temperature using an induction stirrer, and thin-layer chromatography (TLC) was used to track the reaction process. The mixture was allowed to cool naturally once the reaction was finished, neutralized with 10% HCl, and then extracted using diethyl ether. The organic layer was dried with MgSO<sub>4</sub> after being sequentially cleaned with saturated CuSO<sub>4</sub> solution, NaHCO<sub>3</sub>, distilled water, and saturated NaCl. To get the pure product, purify the crude product using column chromatography (EtOAc: *n*-Hexane). H = 94%. <sup>1</sup>H NMR (600 MHz, CDCl<sub>3</sub>): δ 7.00 – 6.94 (*m*,

1H), 5.85 – 5.82 (*m*, 1H), 5.52 – 5.48 (*m*, 1H), 5.38 – 5.35 (*m*, 1H), 4.12 (*t*, *J* = 6.0 Hz, 7.2 Hz, 2H), 2.42 – 2.38 (*m*, 2H), 2.05 – 2.02 (*m*, 2H), 1.87 (*dd*, *J* = 7.2 Hz, 1.8 Hz, 3H), 1.35 – 1.33 (*m*, 2H), 1.32 – 1.27 (*m*, 12H), 0.88 (*t*, *J* = 6.6 Hz, 7.2 Hz, 3H). <sup>13</sup>C NMR (150 MHz, CDCl<sub>3</sub>): δ 166.6; 144.5; 133.0; 124.4; 122.8; 63.7; 31.9; 29.7; 29.6; 29.5; 29.3; 27.3; 26.9; 22.7; 17.9; 14.8.

## 2. Calculation of TON and TOF

*Calculation of %wt Pd in PdNPs@Fu catalyst*

| Parameter                                                                                 | Value             | Remarks                   |
|-------------------------------------------------------------------------------------------|-------------------|---------------------------|
| C <sub>Pd</sub> = ICP-MS Pd concentration (ppb = μg/L; ICP-MS analysis on final solution) | 5.197 ppb         | Average of 2 measurements |
| f = Dilution factor                                                                       | 200 x 100 = 20000 | Provided by the analyst   |
| V <sub>sample</sub> (L) = Sample solution volume                                          | 10 mL = 0.010 L   |                           |
| m = Sample weight in mg                                                                   | 10 mg             |                           |

$$\text{Pd concentration in solution: } C_{\text{solution}} = \frac{C_{\text{Pd}} f}{1000} \quad (\text{Unit: mg/L})$$

$$\text{Pd mass in catalyst: } m_{\text{Pd}} = \frac{C_{\text{Pd}} f V_{\text{sample}}}{10^6} \quad (\text{Unit: mg})$$

$$\text{Pd content: } \text{wt}\% = \frac{C_{\text{Pd}} f V_{\text{sample}}}{10^4 m} \quad (\text{Unit: \%})$$

a) Pd concentration in solution and Pd mass in catalyst:

$$C_{\text{solution}} (\text{mg/L}) = \frac{5.197 \text{ ppb}}{1000} \times 20000 \approx 103.94 \text{ mg/L (or 103.94 ppm)}$$

(with f = 20000)

$$m_{\text{Pd}} = 103.94 \text{ mg/L} \times 0.010 \text{ L} = 1.0394 \text{ mg}$$

b) %wt Pd

$$\% \text{wt Pd} = \frac{1.0394 \text{ mg}}{10 \text{ mg}} \times 100\% = 10.394\%$$

Result: Palladium (Pd) content in PdNPs@Fu catalyst is 10.394 %wt.

$$\text{Moles of Pd catalyst} = \frac{\text{Mass of PdNPs@Fu}}{\text{Molecular mass of Pd}} \times \text{Pd mass in cat.} \approx 0.001953 \text{ mmol}$$

$$\begin{aligned} \text{Moles of product formed} &= \text{Moles of PdNPs@Fu} \times \text{Yield of reaction (\%)} \\ &= 1 \text{ mmol} \times 0.93 \approx 0.93 \text{ mmol} \end{aligned}$$

(Example: 93% yield # 0.93, with Entry 2 – Table 2 of Heck coupling)

*Calculation formula of TON and TOF*

$$\text{Turnover Number (TON): } \text{TON} = \frac{\text{Moles of product formed}}{\text{Moles of Pd catalyst}}$$

Where:

- *Moles of product* = amount of desired product formed (often determined by GC, NMR, or isolation).
- *Moles of Pd catalyst* = total moles of Pd present in the catalyst used (calculated from Pd loading wt% or ICP-MS).

$$\begin{aligned} \text{Turnover Frequency (TOF): } \text{TOF} &= \frac{\text{TON}}{\text{time}} ; \\ &= \frac{\text{Moles of product}}{\text{Moles of Pd catalyst} \times \text{time (h)}}; \end{aligned}$$

Units: TOF is typically given in h<sup>-1</sup>.

*Calculation of TON and TOF (Time t = 6 h)*

We used the optimum catalyst mass of 2.0 mg for the sample reaction (Heck coupling, Entry 6 and Alkyne Reduction, Entry 7).

A. Mol<sub>Pd</sub> catalyst

$$\text{Mol}_{\text{Pd}} = (2.0 \text{ mg} \times 0.10394) / 106.42 \text{ g/mol} \approx 0.001953 \text{ mmol}$$

B. Heck Coupling reaction (Yield = 93%)

$$\text{Mol}_{\text{product}} = 1 \text{ mmol} \times 0.93 = 0.93 \text{ mmol}$$

$$\Rightarrow \text{TON}_{\text{Heck}} = 0.93 \text{ mmol} / 0.001953 \text{ mmol} \approx 476$$

$$\Rightarrow \text{TOF}_{\text{Heck}} = 476 / 6 \text{ h} \approx 79.3 \text{ h}^{-1}$$

C. Alkyne reduction reaction (Yield = 94%)



$$\text{Mol}_{\text{product}} = 1 \text{ mmol} \times 0.94 = 0.94 \text{ mmol}$$

$$\Rightarrow \text{TON}_{\text{Alkyne}} = 0.94 \text{ mmol} / 0.001953 \text{ mmol} \approx 481$$

$$\Rightarrow \text{TOF}_{\text{Alkyne}} = 481 / 6 \text{ h} \approx 80.2 \text{ h}^{-1}$$

### 3. GC-MS spectra of the Heck coupling reaction products (1a-1g)

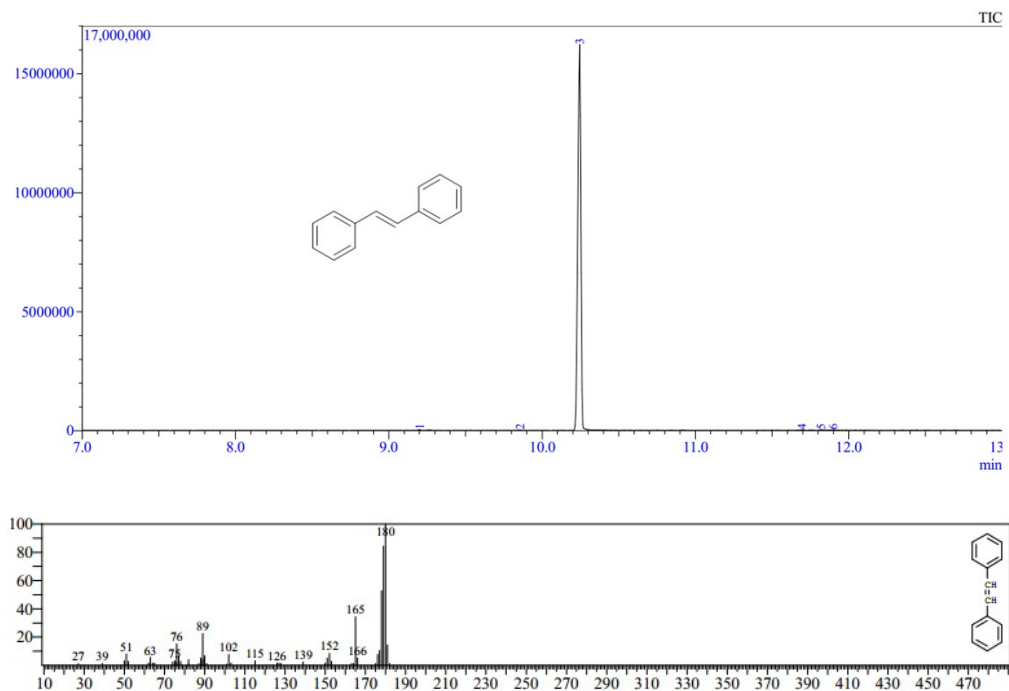

Figure S1. GC-MS spectrum of **1a**

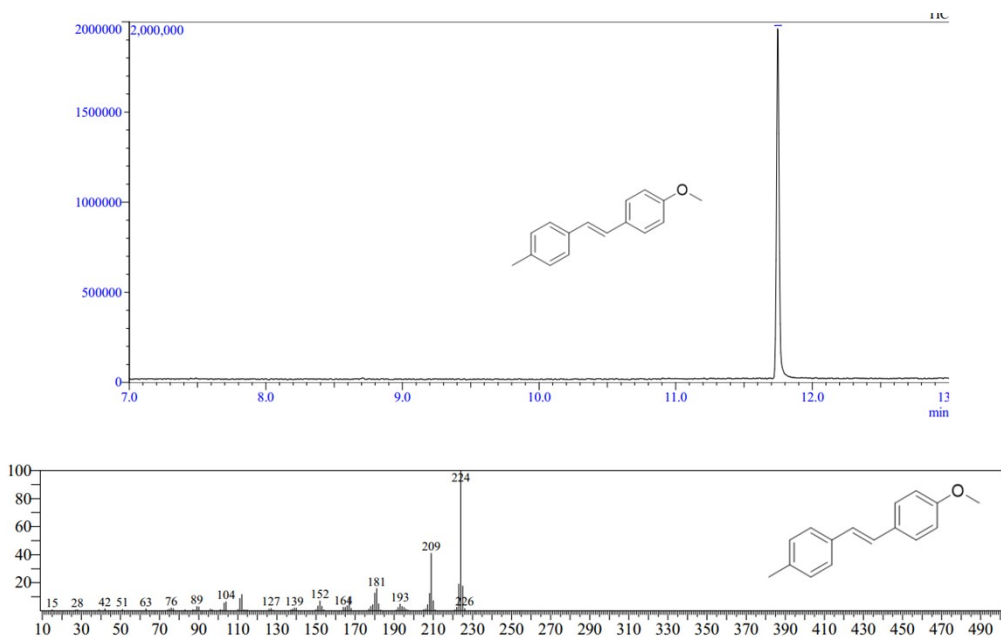

Figure S2. GC-MS spectrum of **1b**

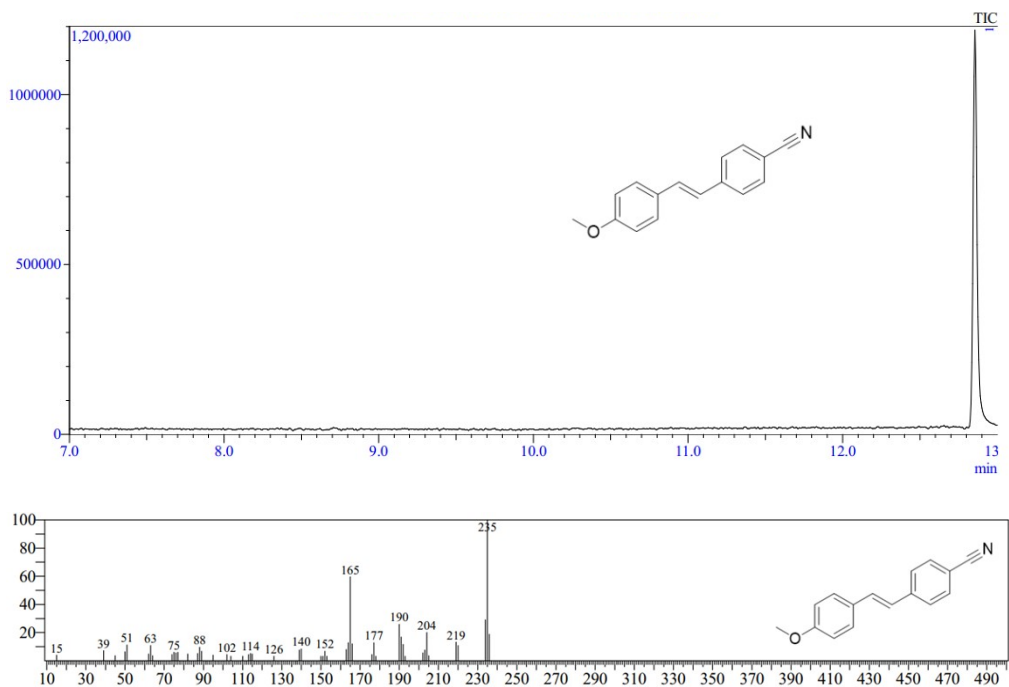

Figure S3. GC-MS spectrum of **1c**

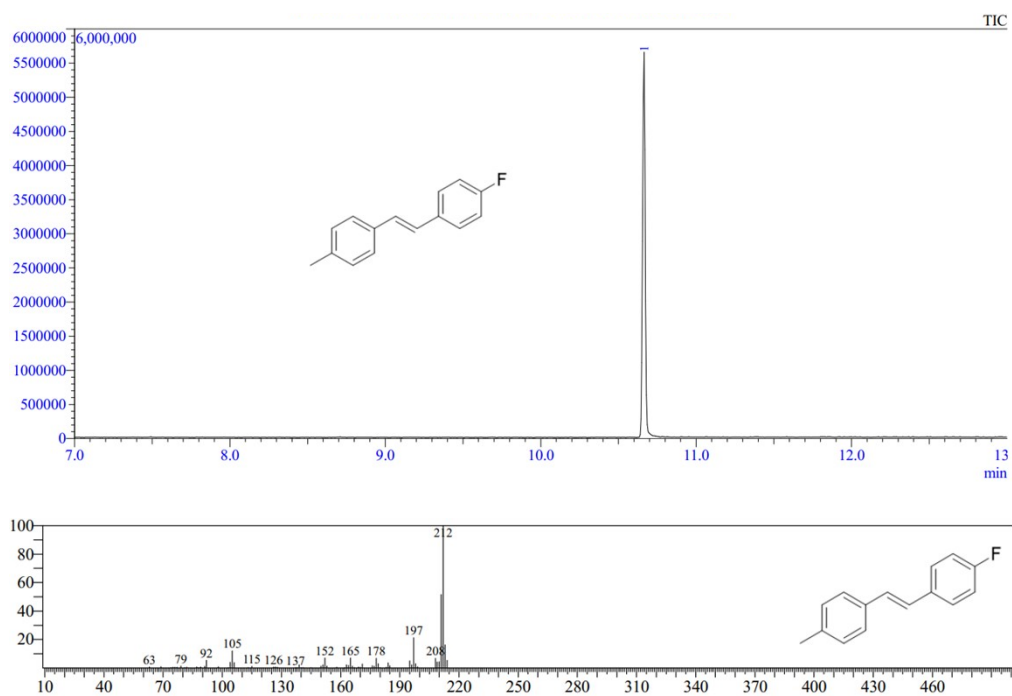

Figure S4. GC-MS spectrum of **1d**

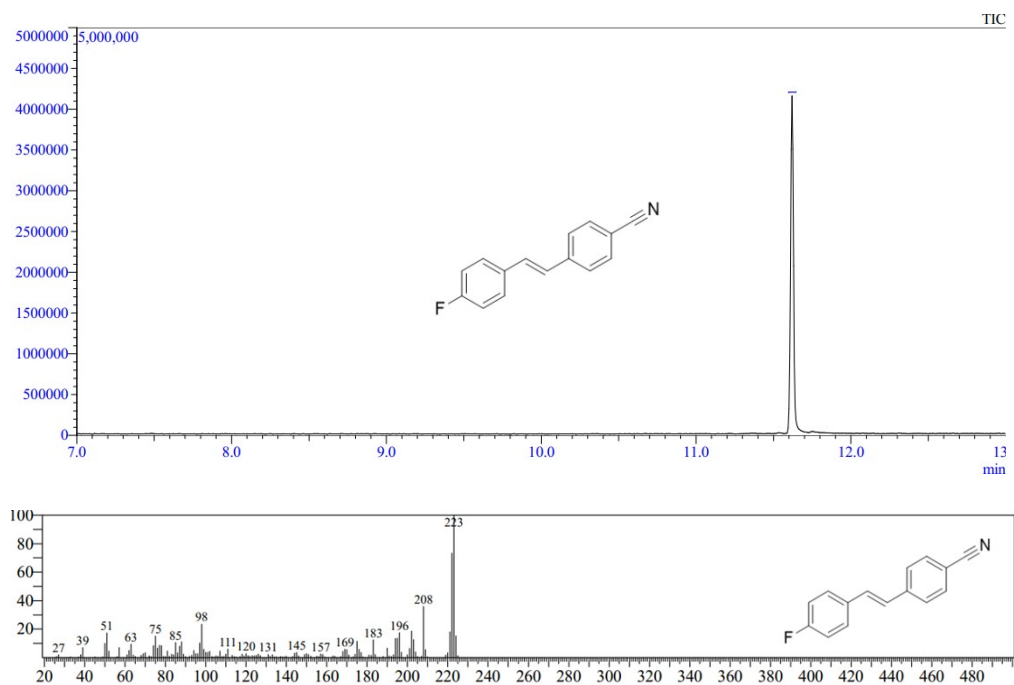

Figure S5. GC-MS spectrum of **1e**

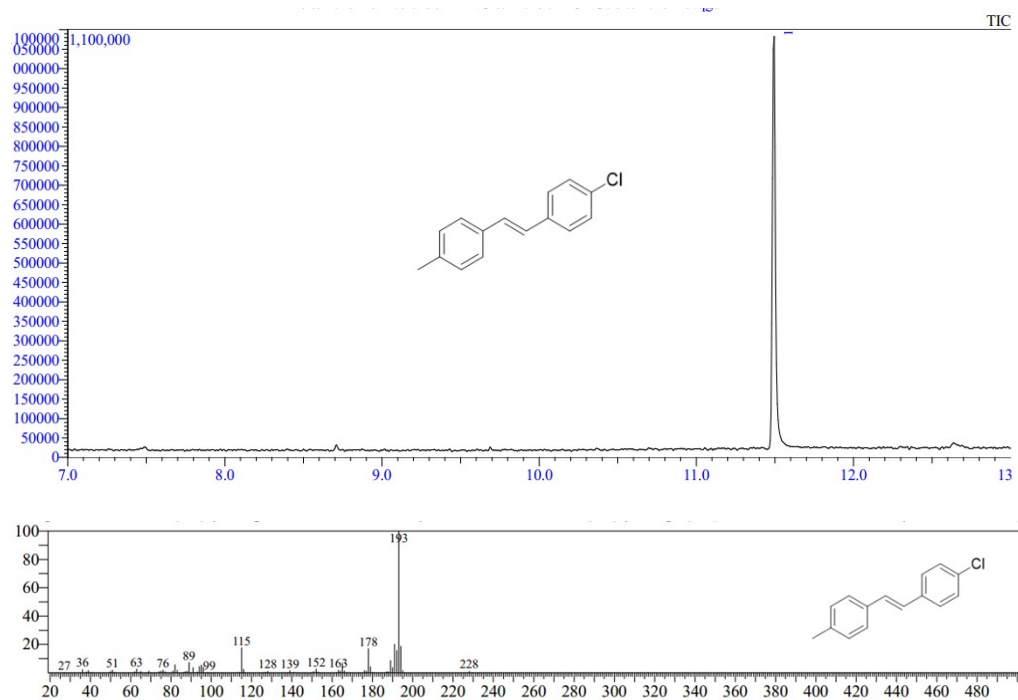

Figure S6. GC-MS spectrum of **1f**

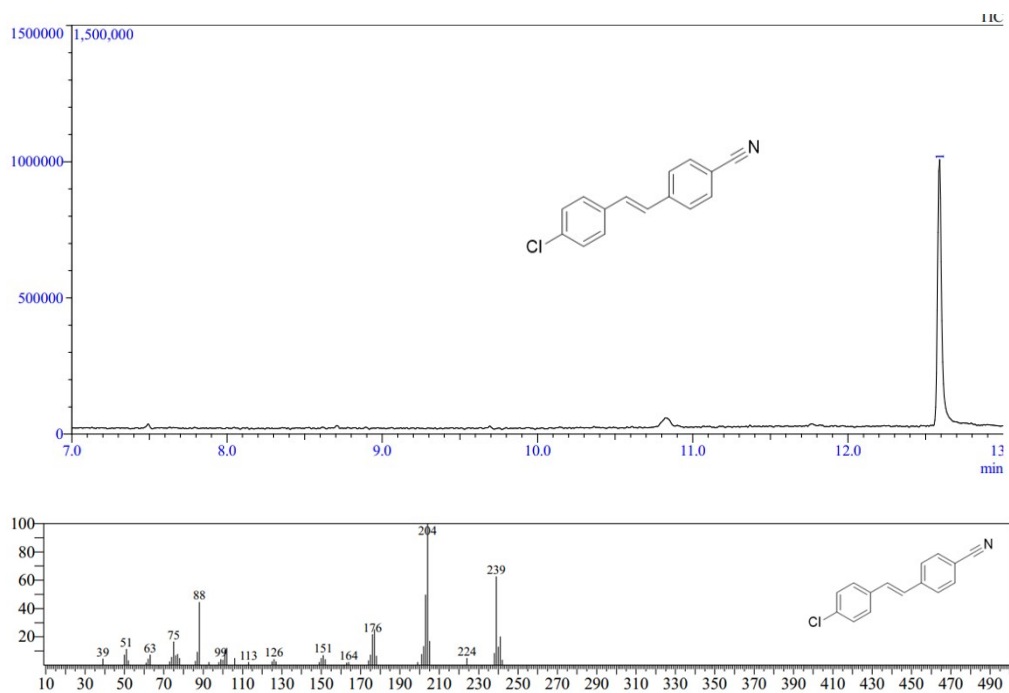

Figure S7. GC-MS spectrum of **1g**

4. GC-MS,  $^1\text{H}$  NMR, and  $^{13}\text{C}$  NMR spectra of the reduced alkyne products  
(2a–2e).

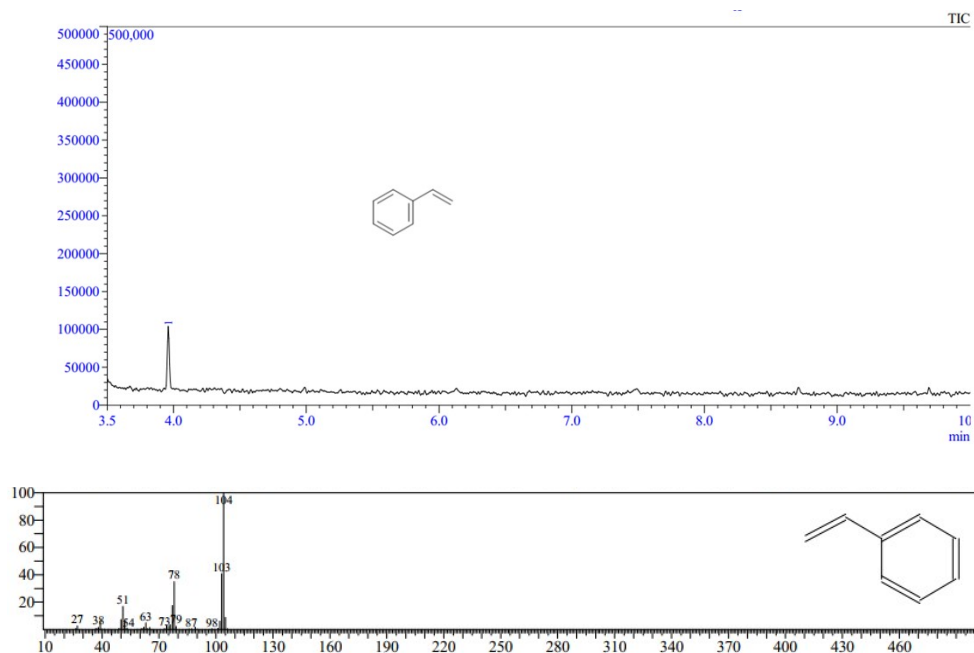

Figure S8. GC-MS spectrum of **2a**

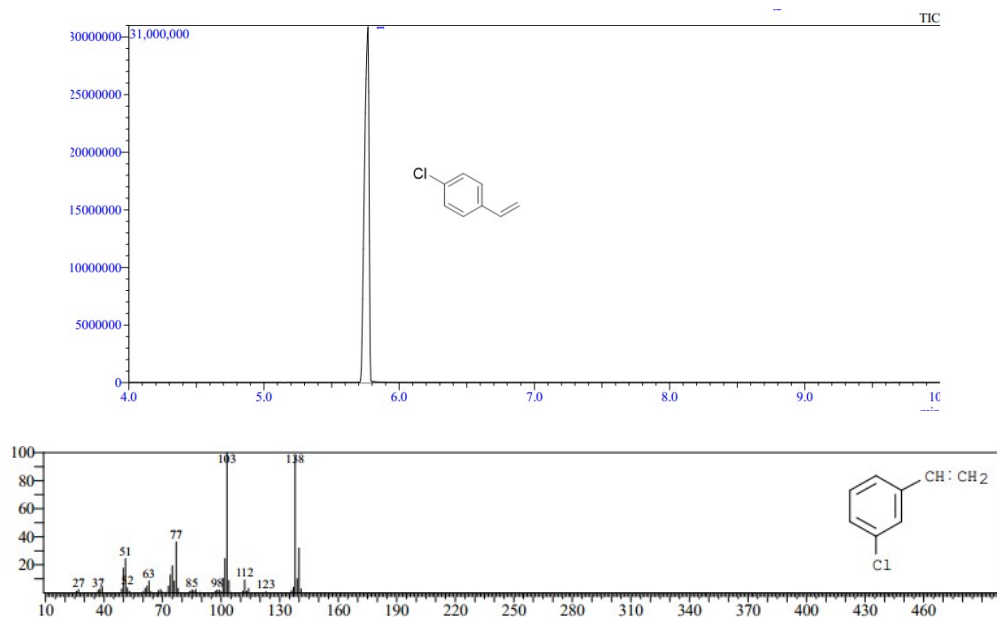

Figure S9. GC-MS spectrum of **2b**

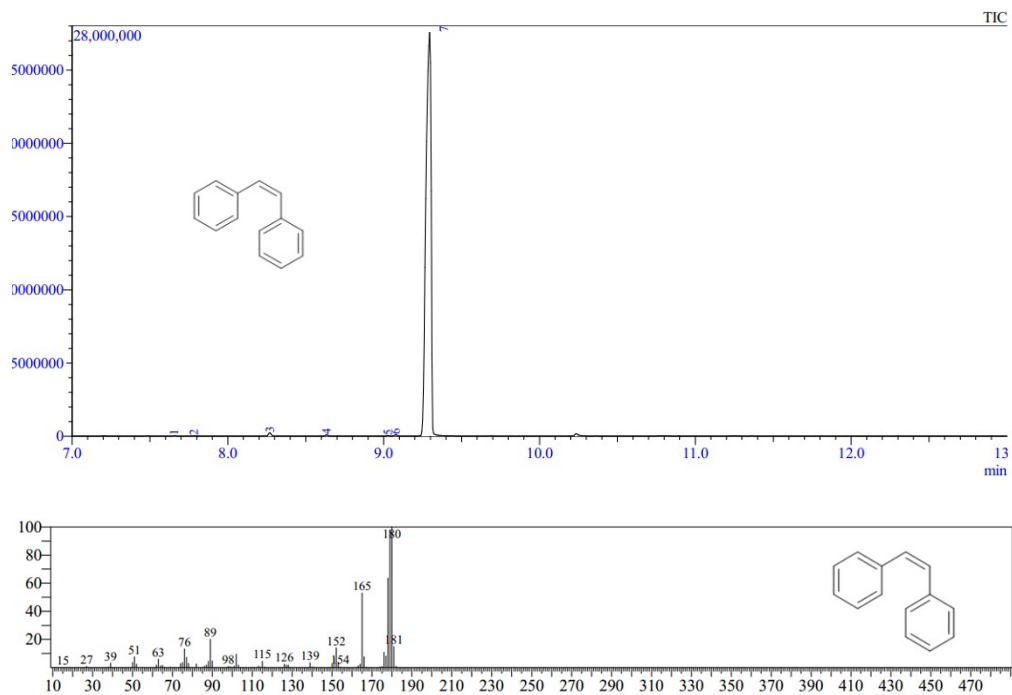

Figure S10. GC-MS spectrum of **2c**

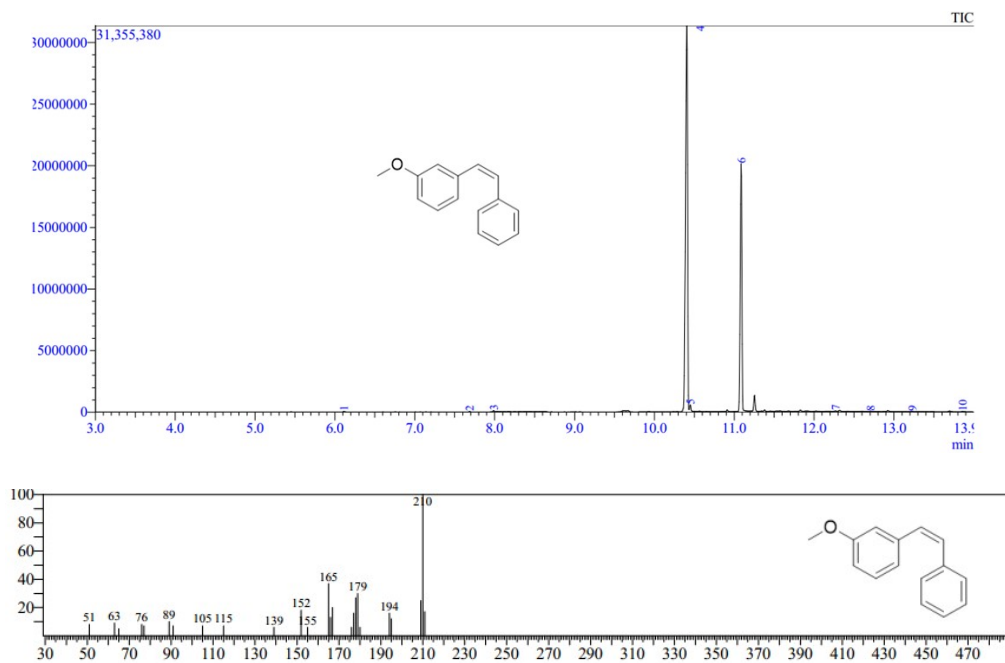

Figure S11. GC-MS spectrum of **2d**

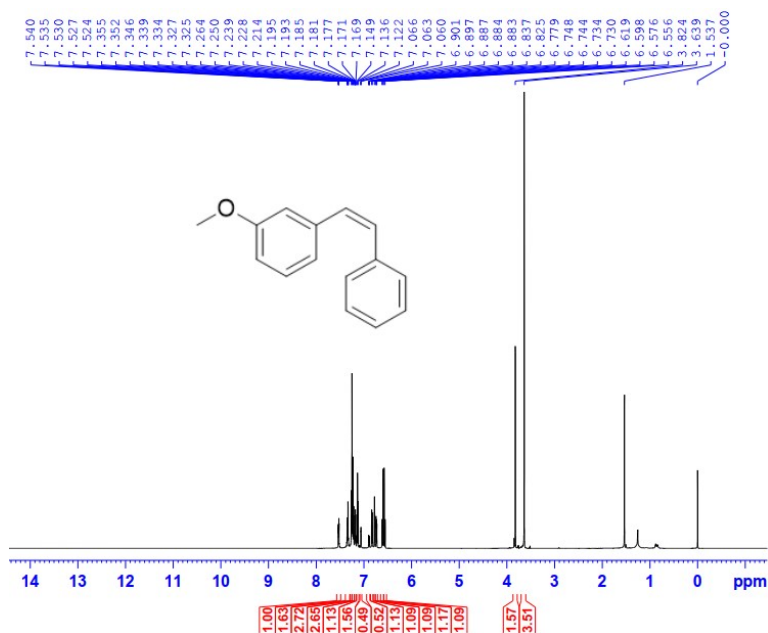

Figure S12. <sup>1</sup>H NMR spectrum of **2d** (600 Hz, CDCl<sub>3</sub>)

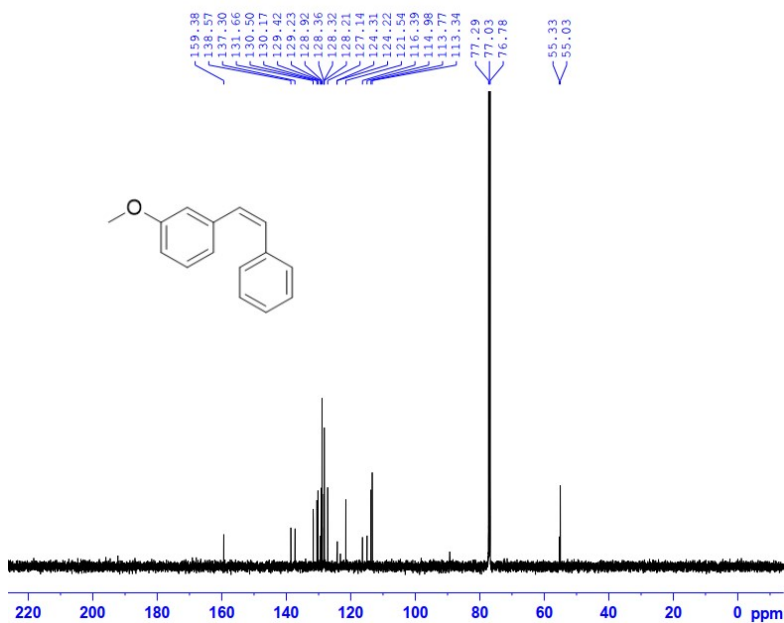

Figure S13. <sup>13</sup>C NMR spectrum of **2d** (150 Hz, CDCl<sub>3</sub>)



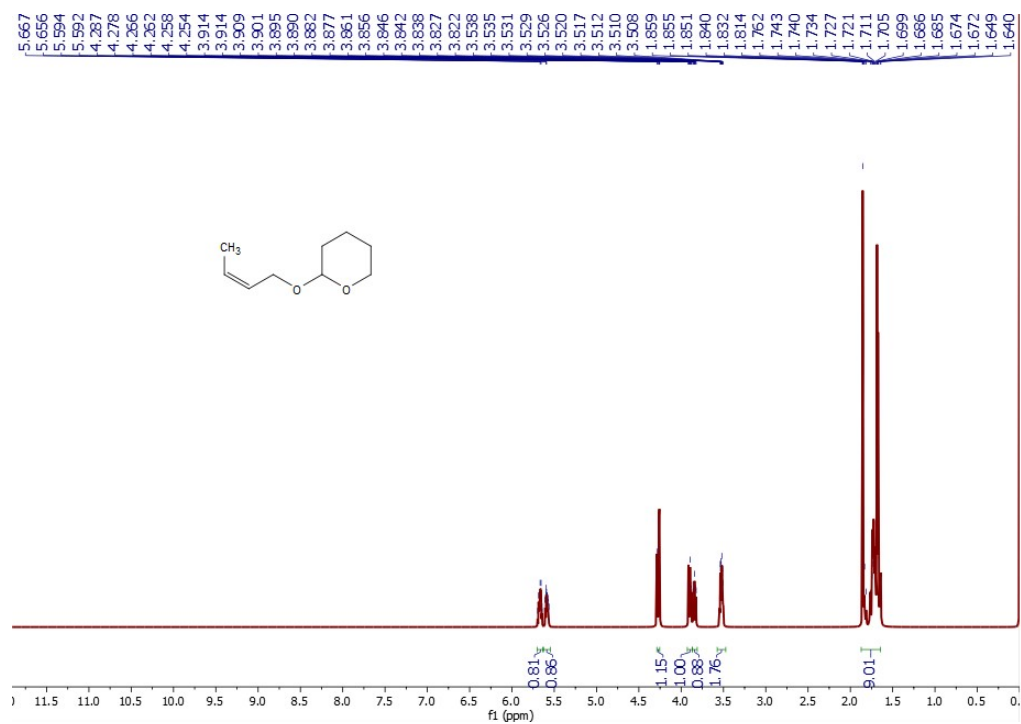

Figure S14. <sup>1</sup>H NMR spectrum of **2e** (600 Hz, CDCl<sub>3</sub>)

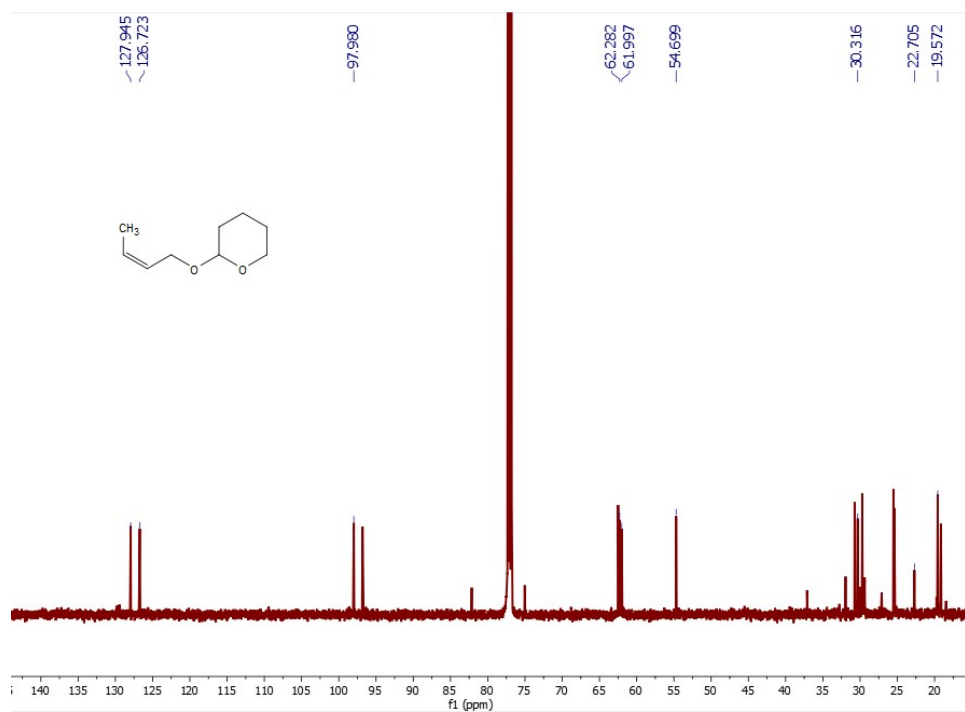

Figure S13. <sup>13</sup>C NMR spectrum of **2e** (150 Hz, CDCl<sub>3</sub>)

## 5. GC–MS, $^1\text{H}$ NMR, and $^{13}\text{C}$ NMR spectra of the synthesized insect pheromone compounds (4–6)

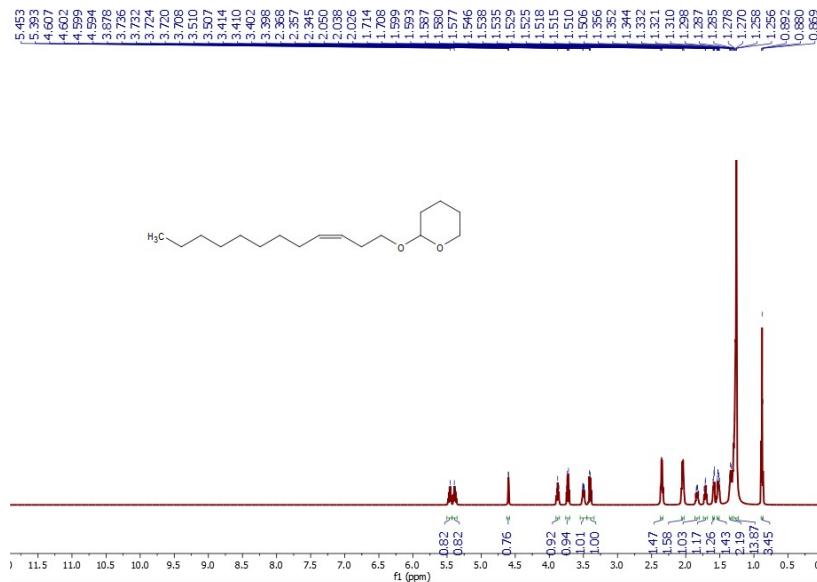

Figure S14.  $^1\text{H}$  NMR spectrum of (4) (600 Hz,  $\text{CDCl}_3$ )

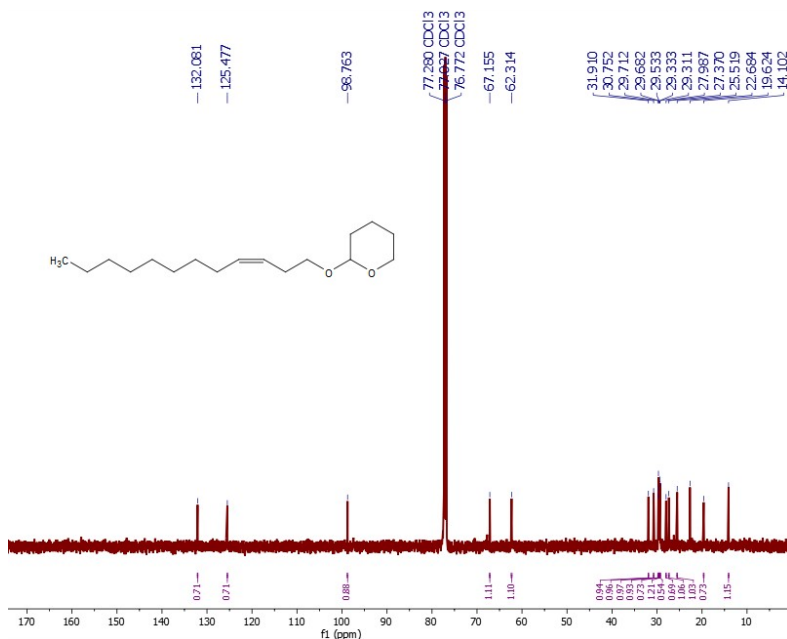

Figure S15.  $^{13}\text{C}$  NMR spectrum of (4) (150 Hz,  $\text{CDCl}_3$ )

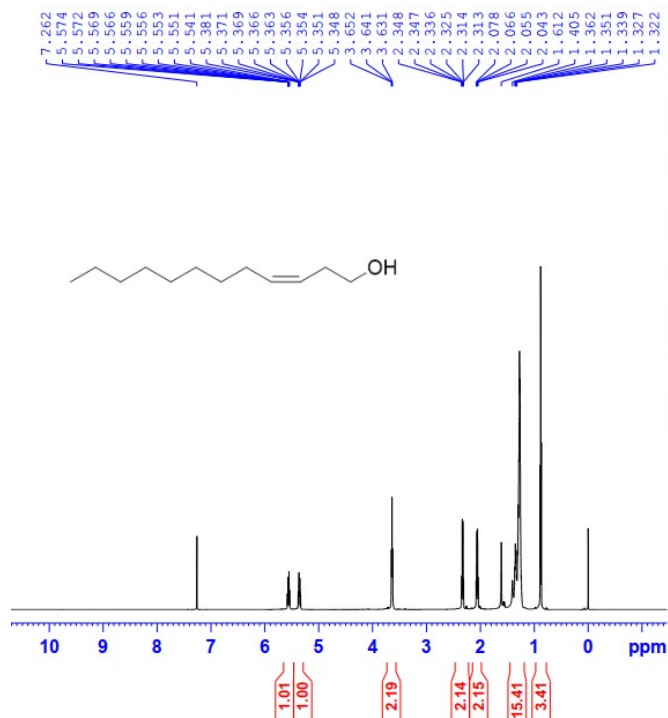

Figure S16. <sup>1</sup>H NMR spectrum of **(5)** (600 Hz, CDCl<sub>3</sub>)

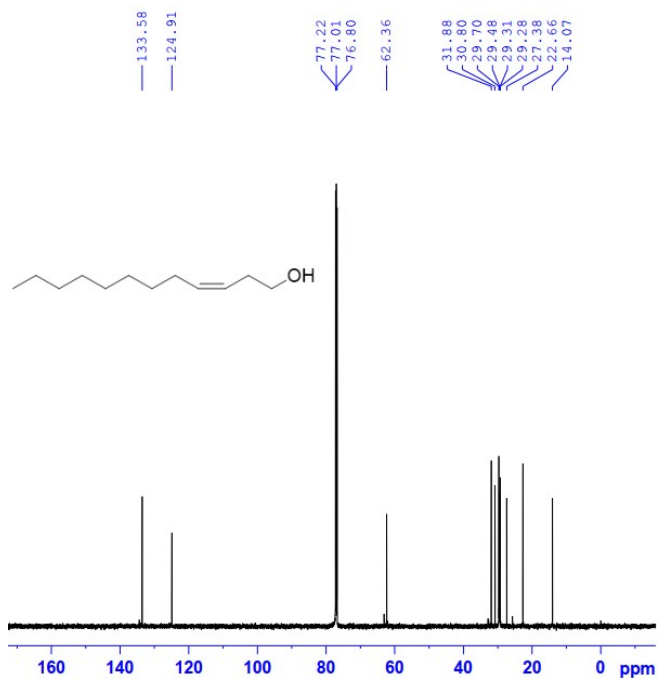

Figure S17. <sup>13</sup>C NMR spectrum of **(5)** (150 Hz, CDCl<sub>3</sub>)

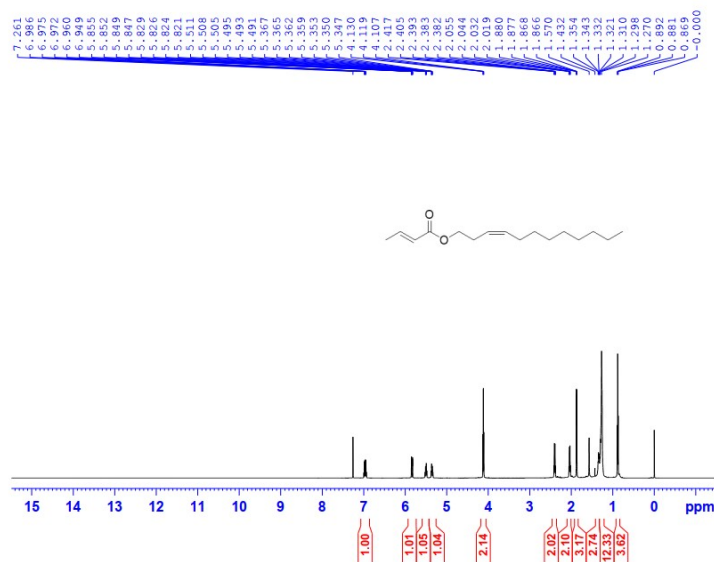

Figure S18. <sup>1</sup>H NMR spectrum of (6) (600 Hz, CDCl<sub>3</sub>)

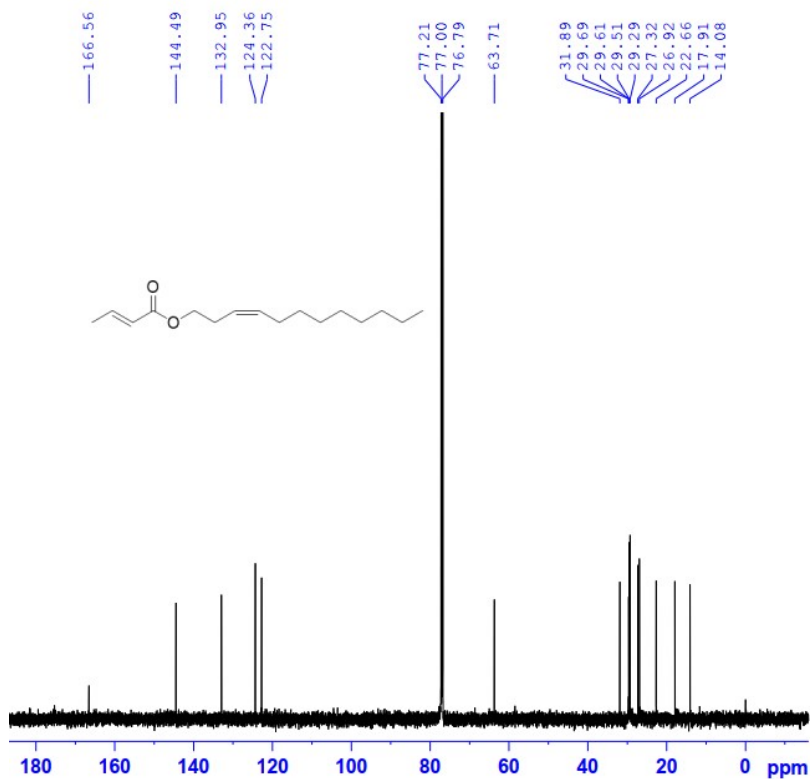

Figure S19. <sup>13</sup>C NMR spectrum of (6) (150 Hz, CDCl<sub>3</sub>)

## 6. ICP-MS and XRD:

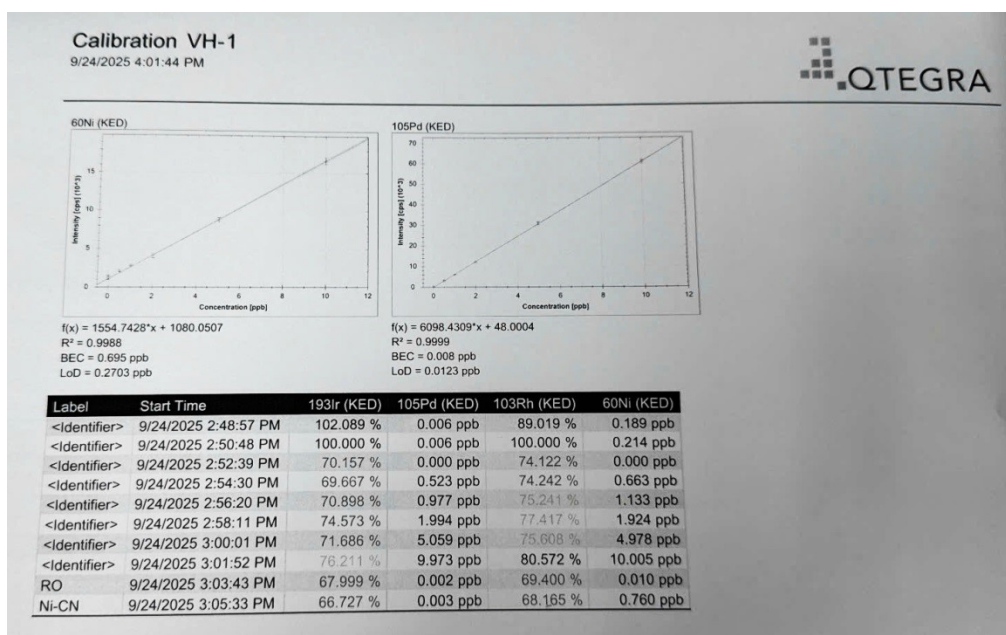

Figure S19. Sample 1 - dissolved PdNPs@Fu in distilled water (H<sub>2</sub>O)

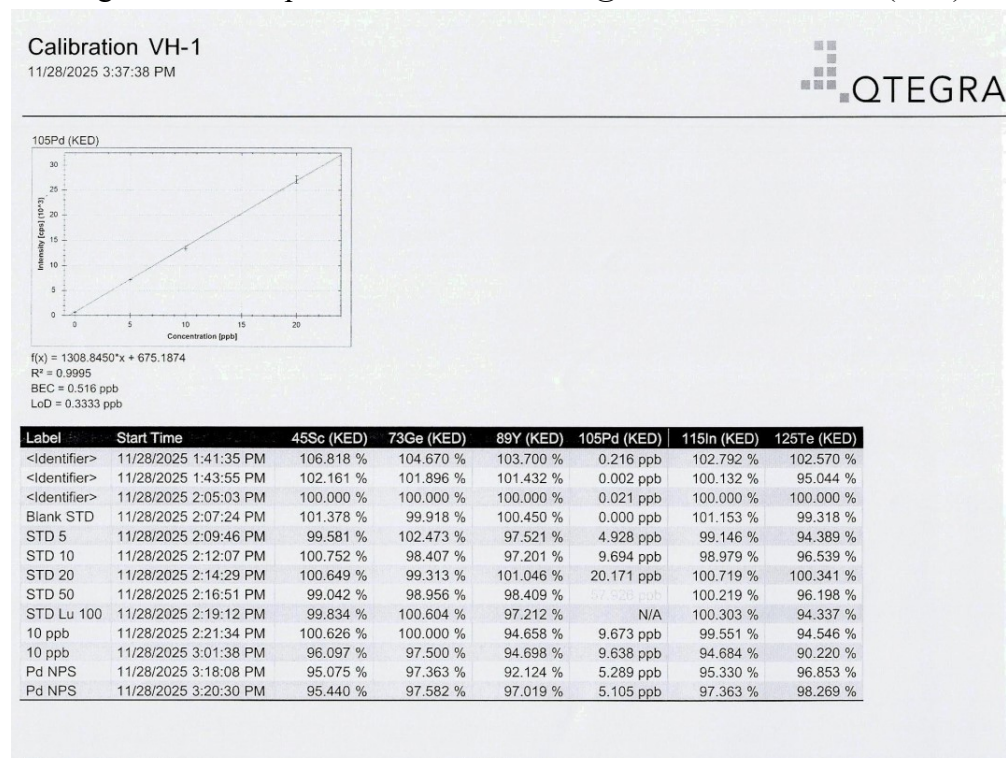

Figure S20. Sample 2 - dissolved in HNO<sub>3</sub>
